# Supplementary material
Source: PubMed Central journal article supplement (PMC6911819)
Supplement: blood893917-suppl1.pdf [file blood893917-suppl1.pdf]

### **Histiocytosis Working Group- active members**

Gaurav Goyal MBBS<sup>1</sup>, Mithun V Shah MD PhD<sup>1</sup>, N Nora Bennani MD<sup>1</sup>, Robert Vassallo MD<sup>2</sup>, Jay H Ryu MD<sup>2</sup>, Aishwarya Ravindran MBBS<sup>3</sup>, Karen L Rech MD<sup>3</sup>, Caroline J Davidge-Pitts MBBCh<sup>4</sup>, W Oliver Tobin MBBCh PhD<sup>5</sup>, Matthew J Koster MD<sup>6</sup>, Julio S Valinotti MD<sup>7</sup>, Jason R Young MD<sup>8</sup>, and Ronald S Go MD<sup>1</sup>

<sup>1</sup>Division of Hematology, Mayo Clinic, Rochester, MN; <sup>2</sup>Division of Pulmonary and Critical Care Medicine, Mayo Clinic, Rochester, MN; <sup>3</sup>Department of Laboratory Medicine and Pathology, Mayo Clinic, Rochester, MN; <sup>4</sup>Division of Endocrinology and Metabolism, Mayo Clinic, Rochester, MN; <sup>5</sup>Division of Neurology, Mayo Clinic, Rochester, MN; <sup>6</sup>Division of Rheumatology, Mayo Clinic, Rochester, MN; <sup>7</sup>Department of Dermatology, Mayo Clinic, Rochester, MN; <sup>8</sup>Department of Radiology, Mayo Clinic, Rochester, MN
